# Supplementary material for: Population genomics reveals possible genetic evidence for parallel evolution of Sebastiscus marmoratus in the northwestern Pacific Ocean
Source: PubMed Central journal article supplement (PMC6769290; doi:10.1098/rsob.190028), 2019-09-04
Supplement: rsob190028supp1.pdf [file rsob190028supp1.pdf]

## **Supplementary information**

### **Population genomics reveals possible genetic evidence for parallel evolution of *Sebastiscus marmoratus* in northwestern Pacific**

Shengyong Xu, Takashi Yanagimoto, Na Song, Shanshan Cai, Tianxiang Gao, Xiumei Zhang

#### **Contents:**

Supplementary Table S1

Supplementary Table S2

Supplementary Table S3

Supplementary Note

Table S1 Statistics describing different properties of each sequenced individual

| ID  | Pop | Raw bases   | Clean bases | Error rate | Q20   | Q30   | GC content | Enzyme catch ratio |
|-----|-----|-------------|-------------|------------|-------|-------|------------|--------------------|
| F1  | FCG | 279,297,216 | 279,297,216 | 0.03       | 96.50 | 91.45 | 40.81      | 98.8               |
| F2  | FCG | 512,185,536 | 512,185,536 | 0.03       | 96.74 | 92.03 | 40.63      | 98.8               |
| F3  | FCG | 536,178,528 | 536,178,240 | 0.03       | 96.64 | 91.75 | 40.99      | 98.5               |
| F5  | FCG | 488,135,808 | 488,135,520 | 0.03       | 96.09 | 90.46 | 41.28      | 98.6               |
| F6  | FCG | 464,407,200 | 464,406,912 | 0.03       | 96.78 | 92.13 | 41.45      | 98.7               |
| F7  | FCG | 584,929,152 | 584,929,152 | 0.03       | 96.51 | 91.52 | 41.08      | 98.5               |
| F8  | FCG | 602,234,496 | 602,234,496 | 0.03       | 96.72 | 91.95 | 41.48      | 98.7               |
| F9  | FCG | 596,807,136 | 596,806,560 | 0.03       | 96.70 | 91.92 | 41.30      | 98.1               |
| F10 | FCG | 509,468,256 | 509,467,968 | 0.03       | 96.37 | 91.14 | 40.48      | 98.5               |
| F11 | FCG | 390,631,680 | 390,631,680 | 0.03       | 96.12 | 90.65 | 40.83      | 98.3               |
| F12 | FCG | 626,775,840 | 626,775,840 | 0.03       | 96.41 | 91.14 | 41.12      | 98.1               |
| F13 | FCG | 547,136,352 | 547,135,488 | 0.03       | 96.33 | 91.00 | 41.30      | 98.6               |
| F15 | FCG | 565,199,712 | 565,199,424 | 0.03       | 96.75 | 92.09 | 41.37      | 98.8               |
| F16 | FCG | 621,485,568 | 621,485,568 | 0.03       | 96.65 | 91.81 | 41.31      | 98.8               |
| F17 | FCG | 638,371,296 | 638,371,296 | 0.03       | 96.60 | 91.71 | 41.23      | 98.8               |
| F18 | FCG | 628,187,616 | 628,187,616 | 0.03       | 96.72 | 92.03 | 41.49      | 98.7               |
| F19 | FCG | 644,270,688 | 644,270,688 | 0.03       | 96.72 | 91.98 | 41.45      | 98.8               |
| F21 | FCG | 652,987,296 | 652,987,296 | 0.03       | 96.13 | 90.47 | 41.44      | 98.7               |
| F22 | FCG | 570,334,176 | 570,334,176 | 0.03       | 96.34 | 91.03 | 41.28      | 98.3               |
| F29 | FCG | 514,808,640 | 514,794,240 | 0.02       | 97.12 | 93.16 | 41.12      | 99.2               |
| R1  | RS  | 613,854,432 | 613,852,992 | 0.01       | 97.91 | 95.15 | 41.36      | 98.6               |
| R2  | RS  | 372,028,896 | 372,016,512 | 0.02       | 97.28 | 93.46 | 41.21      | 99.4               |
| R6  | RS  | 325,704,384 | 325,694,016 | 0.02       | 97.28 | 93.42 | 41.41      | 99.4               |
| R8  | RS  | 331,696,512 | 331,687,584 | 0.02       | 96.90 | 92.53 | 41.33      | 99.4               |
| R9  | RS  | 366,242,976 | 366,230,592 | 0.01       | 97.42 | 93.81 | 41.57      | 99.5               |
| R10 | RS  | 341,650,080 | 341,638,848 | 0.02       | 97.25 | 93.38 | 41.50      | 99.3               |
| R11 | RS  | 369,481,248 | 369,469,728 | 0.02       | 97.32 | 93.56 | 41.50      | 99.4               |
| R12 | RS  | 295,439,904 | 295,433,280 | 0.02       | 97.39 | 93.69 | 41.50      | 99.1               |
| R13 | RS  | 361,205,568 | 361,194,912 | 0.02       | 97.07 | 92.97 | 40.77      | 99.3               |
| R14 | RS  | 333,597,024 | 333,586,368 | 0.02       | 96.75 | 92.37 | 40.43      | 99.2               |
| R15 | RS  | 428,501,376 | 428,491,872 | 0.02       | 96.93 | 92.62 | 41.28      | 99.2               |
| R16 | RS  | 353,727,360 | 353,712,960 | 0.02       | 97.41 | 93.73 | 41.37      | 99.5               |
| R17 | RS  | 404,602,848 | 404,594,784 | 0.02       | 96.91 | 92.63 | 41.42      | 99.4               |
| R18 | RS  | 465,883,776 | 465,871,392 | 0.02       | 97.12 | 93.08 | 41.71      | 99.5               |
| R20 | RS  | 461,024,064 | 461,008,224 | 0.01       | 97.25 | 93.46 | 41.86      | 99.5               |
| R22 | RS  | 367,039,872 | 367,031,232 | 0.02       | 97.25 | 93.42 | 41.51      | 99.5               |
| R23 | RS  | 420,722,784 | 420,710,400 | 0.02       | 97.10 | 93.09 | 41.43      | 99.5               |
| R26 | RS  | 433,393,344 | 433,381,248 | 0.01       | 97.25 | 93.50 | 41.89      | 99.5               |
| R29 | RS  | 460,085,184 | 460,071,360 | 0.02       | 97.28 | 93.48 | 41.78      | 99.5               |
| R30 | RS  | 419,628,384 | 419,620,032 | 0.02       | 96.65 | 91.98 | 41.28      | 99.4               |
| Z1  | ZS  | 723,848,832 | 723,846,528 | 0.01       | 97.72 | 94.84 | 40.44      | 98.5               |

|     |    |               |               |      |       |       |       |      |
|-----|----|---------------|---------------|------|-------|-------|-------|------|
| Z2  | ZS | 662,437,728   | 662,436,864   | 0.01 | 97.94 | 95.23 | 41.09 | 98.6 |
| Z3  | ZS | 597,074,976   | 597,074,400   | 0.01 | 97.90 | 95.15 | 41.03 | 98.5 |
| Z4  | ZS | 668,546,784   | 668,545,920   | 0.01 | 97.91 | 95.23 | 40.95 | 98.5 |
| Z7  | ZS | 657,551,232   | 657,549,792   | 0.01 | 97.89 | 95.22 | 40.69 | 98.7 |
| Z8  | ZS | 624,568,320   | 624,567,168   | 0.01 | 97.93 | 95.24 | 41.13 | 98.4 |
| Z9  | ZS | 610,747,776   | 610,747,488   | 0.01 | 97.68 | 94.73 | 40.30 | 98.2 |
| Z10 | ZS | 655,331,616   | 655,330,464   | 0.01 | 97.94 | 95.18 | 41.02 | 98   |
| Z11 | ZS | 591,719,328   | 591,719,040   | 0.01 | 97.78 | 94.81 | 41.13 | 98.5 |
| Z12 | ZS | 612,705,888   | 612,704,448   | 0.01 | 97.81 | 95.11 | 40.75 | 97.8 |
| Z13 | ZS | 643,852,224   | 643,851,648   | 0.01 | 97.69 | 94.84 | 40.48 | 98.3 |
| Z14 | ZS | 427,900,320   | 427,900,320   | 0.01 | 97.67 | 94.81 | 40.14 | 98.3 |
| Z18 | ZS | 684,231,840   | 684,229,536   | 0.01 | 97.79 | 95.03 | 40.42 | 97.1 |
| Z20 | ZS | 581,005,152   | 581,004,288   | 0.01 | 97.79 | 94.97 | 40.52 | 98.3 |
| Z31 | ZS | 490,484,448   | 490,484,448   | 0.03 | 96.39 | 91.26 | 40.48 | 98.7 |
| Z32 | ZS | 742,958,784   | 742,958,784   | 0.03 | 96.56 | 91.59 | 41.17 | 98.7 |
| Z34 | ZS | 1,154,939,040 | 1,154,884,320 | 0.02 | 97.89 | 94.78 | 41.07 | 99.4 |
| Z35 | ZS | 604,194,048   | 604,194,048   | 0.03 | 96.42 | 91.25 | 41.06 | 98.7 |
| Z36 | ZS | 563,654,304   | 563,654,016   | 0.03 | 96.67 | 91.86 | 40.98 | 98.8 |
| Z37 | ZS | 374,124,960   | 374,112,864   | 0.02 | 97.12 | 93.07 | 41.41 | 99.2 |
|     |    |               |               |      |       |       |       |      |
| J1  | NI | 231,678,144   | 231,664,896   | 0.05 | 93.87 | 85.00 | 39.55 | 90.6 |
| J2  | NI | 270,722,016   | 270,703,296   | 0.05 | 94.02 | 85.00 | 41.19 | 90.4 |
| J3  | NI | 260,223,552   | 260,209,152   | 0.06 | 93.94 | 85.00 | 40.66 | 90.5 |
| J4  | NI | 279,980,928   | 279,961,920   | 0.05 | 93.79 | 85.00 | 41.64 | 90.6 |
| J5  | NI | 286,279,200   | 286,260,192   | 0.04 | 94.40 | 86.52 | 40.66 | 91.7 |
| J6  | NI | 287,759,520   | 287,744,544   | 0.04 | 94.05 | 85.67 | 40.27 | 91.1 |
| J7  | NI | 343,851,264   | 343,827,936   | 0.04 | 94.09 | 85.75 | 39.05 | 91.1 |
| J8  | NI | 318,367,296   | 318,344,256   | 0.04 | 94.44 | 86.62 | 40.48 | 91.7 |
| J9  | NI | 354,643,488   | 354,622,752   | 0.04 | 94.43 | 86.44 | 39.99 | 91.5 |
| J10 | NI | 268,125,696   | 268,110,432   | 0.06 | 94.09 | 85.00 | 40.28 | 90.3 |
|     |    |               |               |      |       |       |       |      |
| X1  | XM | 250,911,072   | 250,897,824   | 0.06 | 93.94 | 85.00 | 41.41 | 90.5 |
| X10 | XM | 253,240,704   | 253,225,728   | 0.05 | 93.86 | 85.25 | 40.66 | 90.8 |
| X2  | XM | 333,902,304   | 333,884,448   | 0.04 | 94.25 | 86.00 | 40.83 | 91.2 |
| X3  | XM | 338,505,408   | 338,491,008   | 0.05 | 93.97 | 85.00 | 39.52 | 90.5 |
| X4  | XM | 266,237,280   | 266,218,272   | 0.04 | 94.41 | 86.56 | 41.03 | 91.7 |
| X5  | XM | 285,449,184   | 285,428,736   | 0.05 | 94.32 | 86.40 | 40.77 | 91.6 |
| X6  | XM | 294,747,552   | 294,729,408   | 0.04 | 94.09 | 85.70 | 40.50 | 91.1 |
| X7  | XM | 301,586,400   | 301,570,272   | 0.04 | 94.22 | 86.05 | 40.57 | 91.3 |
| X8  | XM | 265,672,512   | 265,659,840   | 0.06 | 94.00 | 85.00 | 40.92 | 90.4 |
| X9  | XM | 254,359,584   | 254,347,776   | 0.05 | 94.11 | 85.00 | 39.45 | 90.3 |
|     |    |               |               |      |       |       |       |      |
| G12 | KO | 438,953,184   | 438,952,608   | 0.03 | 96.53 | 91.24 | 41.7  | 99.3 |
| G13 | KO | 550,803,744   | 550,803,168   | 0.03 | 96.27 | 90.6  | 41.01 | 99.2 |
| G14 | KO | 475,020,864   | 475,018,848   | 0.03 | 96.65 | 91.55 | 41.39 | 99.4 |
| G15 | KO | 574,030,368   | 574,029,792   | 0.03 | 96.01 | 90.06 | 40.59 | 99.3 |

|     |    |             |             |      |       |       |       |      |
|-----|----|-------------|-------------|------|-------|-------|-------|------|
| G16 | KO | 473,412,960 | 473,412,672 | 0.03 | 96.69 | 91.82 | 41.55 | 99.4 |
| G18 | KO | 387,787,968 | 387,786,240 | 0.03 | 96.68 | 91.78 | 40.27 | 99.4 |
| G20 | KO | 429,270,048 | 429,268,608 | 0.03 | 96.55 | 91.32 | 41.41 | 99.3 |
| G21 | KO | 411,142,176 | 411,141,312 | 0.03 | 96.5  | 91.39 | 40.6  | 99.2 |
| G22 | KO | 162,223,200 | 162,222,624 | 0.03 | 95.95 | 90.08 | 39.47 | 99.1 |
| G4  | KO | 211,487,040 | 211,486,752 | 0.03 | 96.47 | 91.34 | 40.68 | 99.2 |
| Y11 | YO | 454,484,448 | 454,483,584 | 0.03 | 96.27 | 90.72 | 40.98 | 99.2 |
| Y12 | YO | 225,791,712 | 225,791,424 | 0.03 | 96.38 | 91.11 | 40.76 | 99.2 |
| Y13 | YO | 471,962,880 | 471,961,152 | 0.03 | 96.67 | 91.73 | 41.34 | 99.4 |
| Y15 | YO | 525,339,072 | 525,337,056 | 0.03 | 96.51 | 91.28 | 41.45 | 99.3 |
| Y17 | YO | 322,540,992 | 322,539,264 | 0.03 | 96.29 | 90.94 | 40.59 | 99.4 |
| Y18 | YO | 290,228,256 | 290,227,680 | 0.03 | 96.47 | 91.41 | 40.77 | 99.4 |
| Y19 | YO | 550,646,208 | 550,645,056 | 0.03 | 96.68 | 91.66 | 41.44 | 99.1 |
| Y22 | YO | 209,812,032 | 209,812,032 | 0.03 | 95.66 | 89.34 | 39.33 | 99.1 |
| Y3  | YO | 174,844,800 | 174,844,512 | 0.03 | 96.13 | 90.56 | 40.56 | 99.1 |
| Y9  | YO | 276,379,200 | 276,378,912 | 0.03 | 96.34 | 90.98 | 40.86 | 99.2 |
| N1  | TO | 462,798,432 | 462,798,144 | 0.03 | 95.92 | 89.77 | 41.5  | 99.4 |
| N10 | TO | 474,031,296 | 474,030,144 | 0.03 | 96.16 | 90.38 | 41.7  | 99.4 |
| N11 | TO | 470,651,040 | 470,650,752 | 0.03 | 96.47 | 91.09 | 42.08 | 99.5 |
| N3  | TO | 411,908,256 | 411,907,392 | 0.03 | 96.66 | 91.74 | 41.2  | 99.5 |
| N4  | TO | 433,440,288 | 433,439,136 | 0.03 | 96.33 | 90.89 | 41.49 | 99.3 |
| N5  | TO | 429,002,208 | 429,000,768 | 0.03 | 96.61 | 91.48 | 41.62 | 99.5 |
| N6  | TO | 501,343,488 | 501,341,760 | 0.03 | 96.58 | 91.42 | 41.53 | 99.2 |
| N7  | TO | 353,541,600 | 353,540,736 | 0.03 | 96.16 | 90.41 | 41.02 | 99.4 |
| N8  | TO | 367,263,072 | 367,262,496 | 0.03 | 96.05 | 90.22 | 40.75 | 99.2 |
| N9  | TO | 479,788,992 | 479,788,704 | 0.03 | 96.24 | 90.48 | 41.6  | 99.3 |
| Y1  | IK | 588,763,008 | 588,662,784 | 0.02 | 96.96 | 92.15 | 42.06 | 99   |
| Y10 | IK | 616,333,248 | 616,240,512 | 0.03 | 96.15 | 90.23 | 41.41 | 98.6 |
| Y13 | IK | 528,535,008 | 528,457,536 | 0.03 | 96.58 | 91.22 | 41.1  | 98.6 |
| Y14 | IK | 466,936,704 | 466,856,640 | 0.03 | 96.83 | 91.87 | 41.48 | 98.9 |
| Y15 | IK | 706,539,168 | 706,415,616 | 0.03 | 96.69 | 91.58 | 41.75 | 98.8 |
| Y20 | IK | 398,496,960 | 398,427,264 | 0.03 | 96.73 | 91.91 | 41.2  | 98.7 |
| Y22 | IK | 524,778,336 | 524,693,376 | 0.03 | 96.56 | 91.48 | 41.11 | 98.8 |
| Y3  | IK | 537,937,344 | 537,844,608 | 0.03 | 96.6  | 91.52 | 41.05 | 98.8 |
| Y4  | IK | 679,418,208 | 679,305,024 | 0.03 | 96.59 | 91.66 | 41.14 | 98.9 |
| Y6  | IK | 579,987,360 | 579,898,080 | 0.03 | 96.77 | 91.89 | 41.59 | 98.9 |
| H13 | ZH | 788,605,920 | 788,471,424 | 0.03 | 97.02 | 92.6  | 41.41 | 99   |
| H14 | ZH | 672,548,832 | 672,435,072 | 0.03 | 96.69 | 91.84 | 40.56 | 98.7 |
| H17 | ZH | 699,660,288 | 699,554,880 | 0.03 | 96.94 | 92.23 | 41.39 | 98.6 |
| H18 | ZH | 428,307,264 | 428,237,280 | 0.02 | 96.95 | 92.48 | 40.52 | 98.5 |
| H21 | ZH | 629,594,496 | 629,496,288 | 0.03 | 96.5  | 91.05 | 41.61 | 98.8 |
| H22 | ZH | 668,142,144 | 668,039,904 | 0.03 | 96.36 | 90.74 | 41.3  | 98.9 |

|     |    |             |             |      |       |       |       |      |
|-----|----|-------------|-------------|------|-------|-------|-------|------|
| H24 | ZH | 653,014,656 | 652,916,160 | 0.03 | 96.56 | 91.36 | 40.89 | 98.7 |
| H3  | ZH | 465,552,864 | 465,480,864 | 0.03 | 96.53 | 91.19 | 41.76 | 98.6 |
| H5  | ZH | 565,880,256 | 565,785,216 | 0.03 | 96.83 | 92    | 40.88 | 98.7 |
| H9  | ZH | 777,025,152 | 776,900,736 | 0.03 | 96.55 | 91.16 | 41.22 | 98.9 |

---

Supplementary Table S2 Descriptions of blast results and gene annotation

|                  | Description                                                        | Length | Hits | e-Value  | sim mean | GO Names list                                                                                                                                                                                                                                                                                                     |
|------------------|--------------------------------------------------------------------|--------|------|----------|----------|-------------------------------------------------------------------------------------------------------------------------------------------------------------------------------------------------------------------------------------------------------------------------------------------------------------------|
| Contig<br>158238 | polypeptide N-<br>acetylgalactosaminyltransferase 18<br>isoform X2 | 210    | 20   | 4.34E-34 | 99.80%   | F:transferase activity, transferring glycosyl groups; C:integral component of membrane; P:protein glycosylation; C:Golgi membrane; F:carbohydrate binding                                                                                                                                                         |
| Contig<br>368320 | dnaJ homolog subfamily B member 11                                 | 308    | 20   | 8.00E-11 | 95.35%   | F:unfolded protein binding; P:protein folding                                                                                                                                                                                                                                                                     |
| Contig<br>43470  | 39S ribosomal mitochondrial                                        | 174    | 20   | 1.62E-16 | 94.95%   | F:structural constituent of ribosome; C:mitochondrion; P:ribosome biogenesis; C:ribosome; P:translation                                                                                                                                                                                                           |
| Contig<br>545705 | myosin heavy fast skeletal muscle-                                 | 145    | 20   | 1.01E-08 | 94.60%   | C:myosin complex; F:motor activity                                                                                                                                                                                                                                                                                |
| Contig<br>522430 | disintegrin and metallo ase domain-<br>containing 10-like          | 308    | 20   | 1.53E-18 | 89.00%   | F:zinc ion binding; P:integrin-mediated signaling pathway; P:Notch signaling pathway; P:membrane protein ectodomain proteolysis; C:integral component of membrane; F:metalloendopeptidase activity                                                                                                                |
| Contig<br>321865 | RNA-directed DNA polymerase from<br>mobile element jockey-         | 202    | 20   | 4.37E-20 | 88.65%   | F:RNA-directed DNA polymerase activity; C:voltage-gated calcium channel complex; P:calcium ion transmembrane transport; P:RNA-dependent DNA biosynthetic process; F:voltage-gated calcium channel activity                                                                                                        |
| Contig<br>160553 | crumbs homolog 2-like                                              | 195    | 20   | 4.96E-17 | 75.25%   | F:oxidoreductase activity, acting on paired donors, with incorporation or reduction of molecular oxygen, 2-oxoglutarate as one donor, and incorporation of one atom each of oxygen into both donors; C:integral component of membrane; F:methyltransferase activity; P:oxidation-reduction process; P:methylation |
| Contig<br>264384 | LINE-1 reverse transcriptase                                       | 257    | 15   | 3.25E-09 | 73.27%   | P:cortical actin cytoskeleton organization; F:RNA-directed DNA polymerase activity; C:cytoskeleton; F:actin binding; F:structural molecule activity; P:RNA-dependent DNA biosynthetic process; F:cytoskeletal protein binding                                                                                     |

Supplementary Table S3 Genetic diversity estimates of subsampled populations using neutral loci

| Site code | Nucleotide diversity | Observed heterozygosity | Expected heterozygosity |
|-----------|----------------------|-------------------------|-------------------------|
| NI        | 0.112±0.056          | 0.174±0.128             | 0.170±0.097             |
| KO        | 0.082±0.041          | 0.172±0.147             | 0.165±0.105             |
| YO        | 0.075±0.038          | 0.176±0.159             | 0.166±0.108             |
| TO        | 0.074±0.037          | 0.171±0.149             | 0.162±0.106             |
| IK        | 0.116±0.058          | 0.179±0.129             | 0.175±0.099             |
| RS        | 0.179±0.089          | 0.201±0.121             | 0.217±0.107             |
| ZS        | 0.225±0.112          | 0.229±0.127             | 0.246±0.111             |
| XM        | 0.115±0.057          | 0.175±0.123             | 0.172±0.098             |
| ZH        | 0.124±0.062          | 0.180±0.123             | 0.178±0.099             |
| FCG       | 0.141±0.070          | 0.185±0.117             | 0.190±0.104             |

## Supplementary Note

The parameter scripts of BWA, SAMtools and VCFtools in the present study were as following:

**BWA:** `bwa index -a is; bwa mem;`

**SAMtools:** `samtools view -S -b; sort -l 0; mpileup -B -C 50 -g -u -D -q 0 -Q 13 -I | bcftools view -bvcg -;`

**VCFtools:** `vcfutils.pl varFilter -Q 30 -d 10 -D 200; vcfutils --recode --out --maf 0.05 --hwe 0.05 -min-alleles 2 --max-alleles 2 --max-missing 0.9 --remove-indels.`
